# Supplementary material for: Intron Retention in the 5′UTR of the Novel ZIF2 Transporter Enhances Translation to Promote Zinc Tolerance in Arabidopsis
Source: PubMed Central journal article supplement (PMC4022490; doi:10.1371/journal.pgen.1004375), 2014-05-15
Supplement: pgen.1004375.s001.pdf [file pgen.1004375.s001.pdf]

## Figure S1

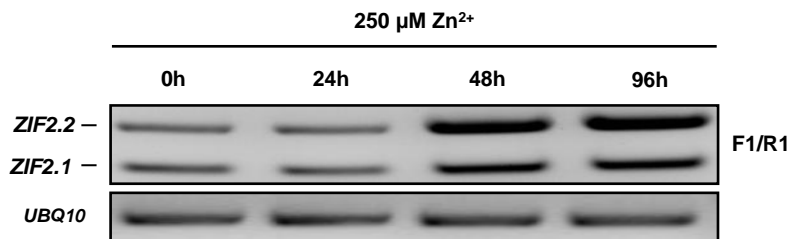

**Figure S1** Expression kinetics of the *ZIF2.1* and *ZIF2.2* splice variants under zinc toxicity. RT-PCR profile of *ZIF2.1* and *ZIF2.2* expression in roots of 7-d old wild-type (Col-0) seedlings challenged for 0, 24, 48 or 96h with 250  $\mu\text{M Zn}$ . The location of the F1 and R1 primers used is shown in Figure 2A. Expression of the *UBQ10* gene was used as a loading control. Results are representative of two independent experiments.
