# Supplementary material for: Intron Retention in the 5′UTR of the Novel ZIF2 Transporter Enhances Translation to Promote Zinc Tolerance in Arabidopsis
Source: PubMed Central journal article supplement (PMC4022490; doi:10.1371/journal.pgen.1004375), 2014-05-15
Supplement: pgen.1004375.s004.pdf [file pgen.1004375.s004.pdf]

## Figure S4

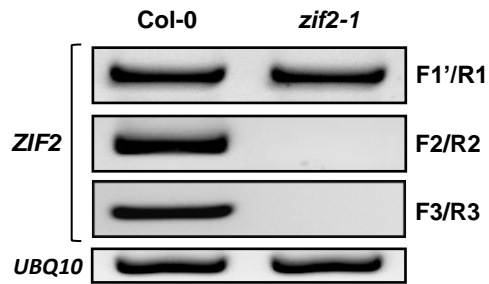

**Figure S4** *ZIF2* expression in the *Arabidopsis zif2-1* mutant. RT-PCR analysis of *ZIF2* expression in 14-d old wild-type (Col-0) and mutant (*zif2-1*) seedlings. The location of the F1', R1, F2, R2, F3 and R3 primers used is shown in Figure 2A. Expression of the *UBQ10* gene was used as a loading control. Results are representative of three independent experiments.
