# Supplementary material for: Intron Retention in the 5′UTR of the Novel ZIF2 Transporter Enhances Translation to Promote Zinc Tolerance in Arabidopsis
Source: PubMed Central journal article supplement (PMC4022490; doi:10.1371/journal.pgen.1004375), 2014-05-15
Supplement: pgen.1004375.s005.pdf [file pgen.1004375.s005.pdf]

**Figure S5**

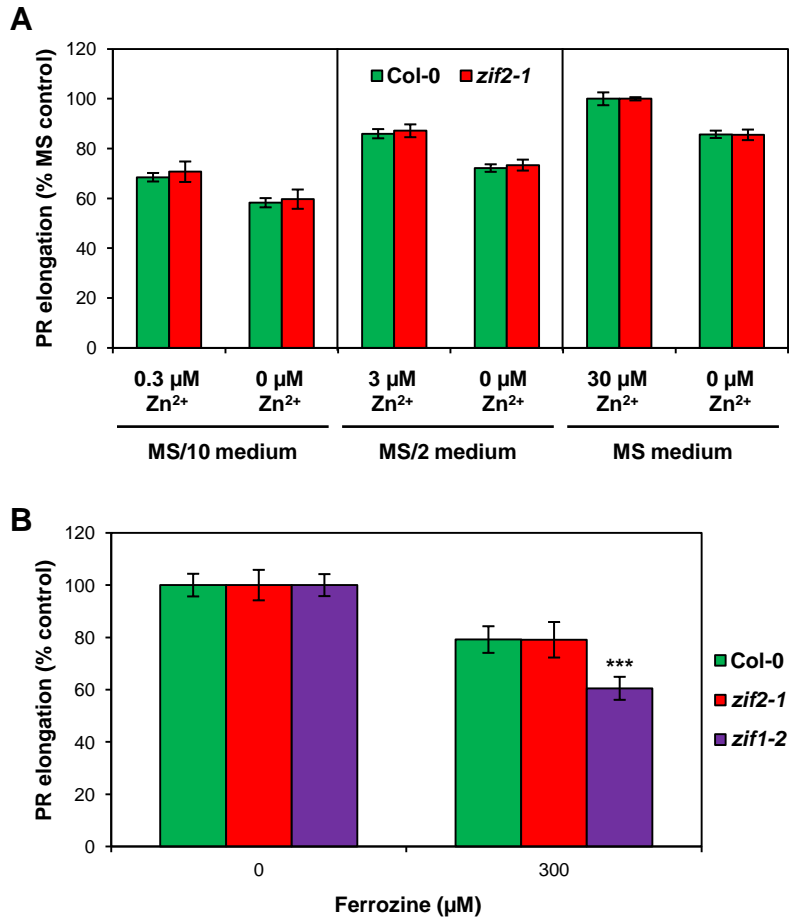

**Figure S5** Phenotype of the *Arabidopsis zif2-1* mutant under zinc or iron deficiency. Effect of Zn deficiency under different MS strengths (**A**) and of ferrozine-induced Fe deficiency (**B**) on PR elongation of wild-type (Col-0) and *zif2-1* or *zif1-2* mutant seedlings. Results are representative of two independent experiments and values represent means  $\pm$  SD ( $n=16$ ). Asterisks denote statistically significant differences from the wild type under each condition (\*\*\*)  $P < 0.001$ ; Student's  $t$ -test).
