# Supplementary material for: Intron Retention in the 5′UTR of the Novel ZIF2 Transporter Enhances Translation to Promote Zinc Tolerance in Arabidopsis
Source: PubMed Central journal article supplement (PMC4022490; doi:10.1371/journal.pgen.1004375), 2014-05-15
Supplement: pgen.1004375.s006.pdf [file pgen.1004375.s006.pdf]

**Figure S6**

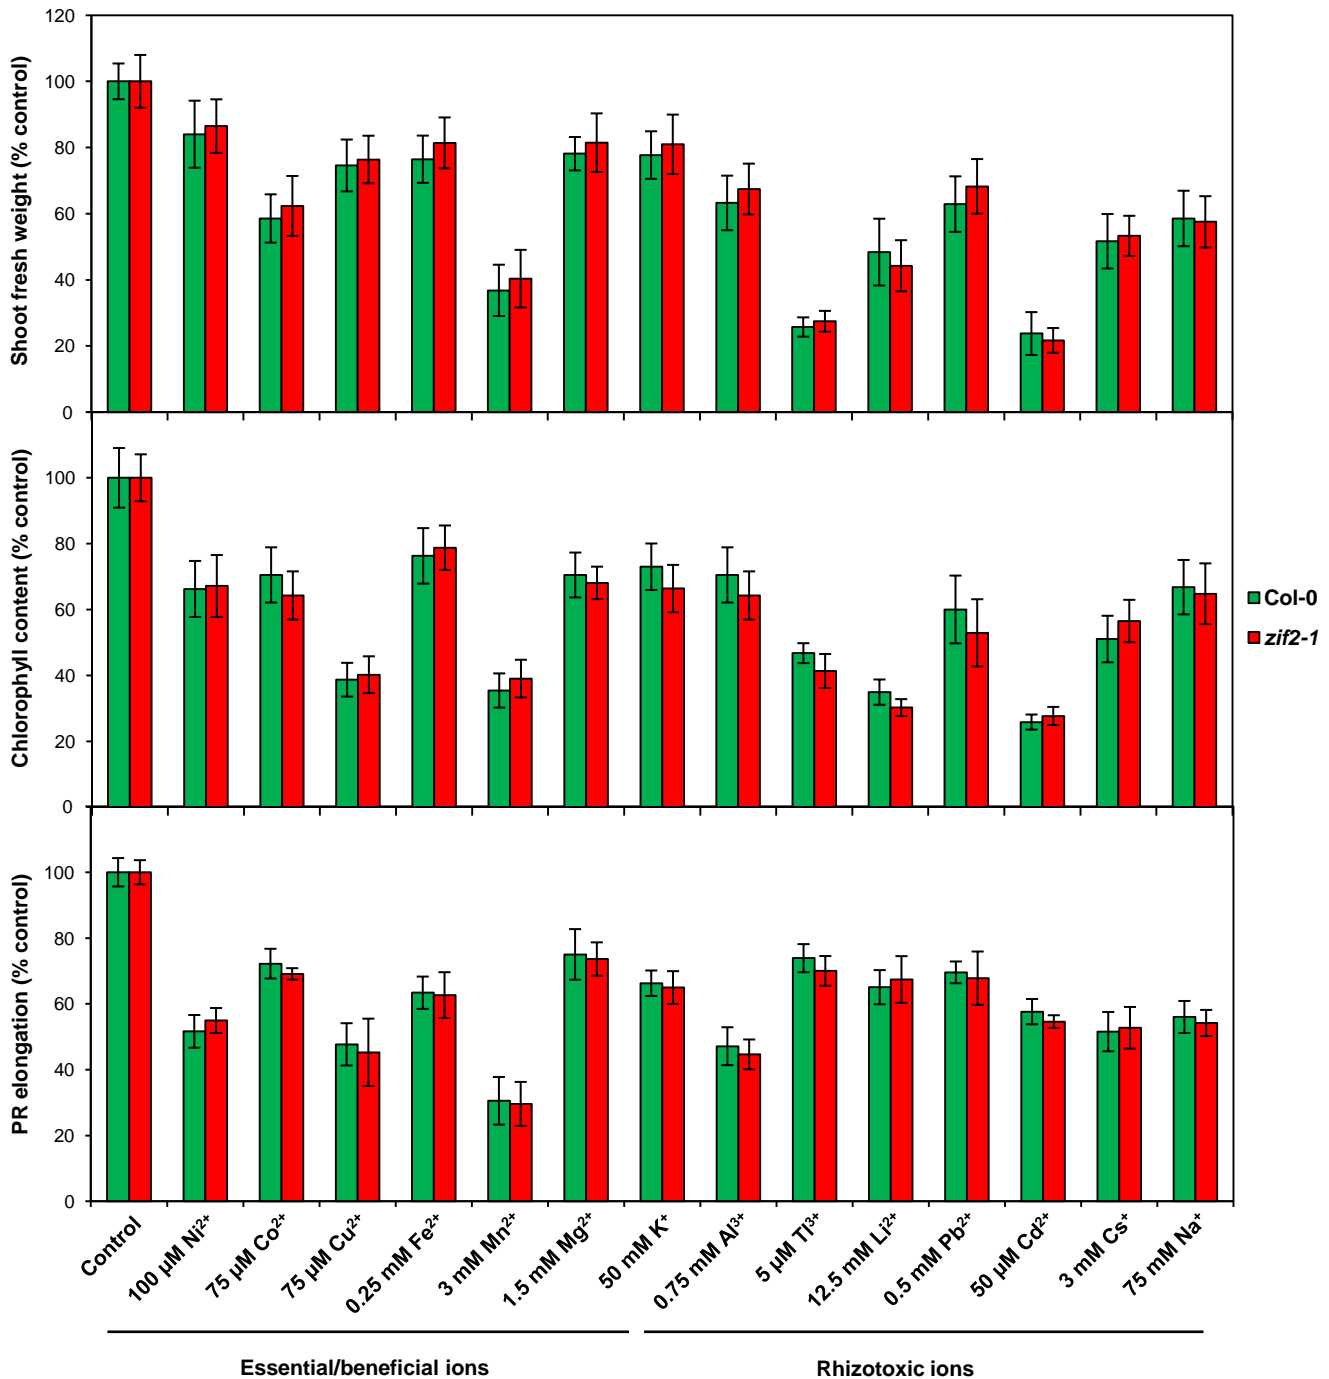

**Figure S6** Supplemental ion response characterisation of the *Arabidopsis zif2-1* mutant. Effect of excess of essential/beneficial cations and of rhizotoxic cations on shoot biomass (upper panel), chlorophyll content (middle panel) and PR elongation (lower panel) of wild-type (Col-0) and mutant (*zif2-1*) seedlings. Results are representative of two independent experiments and values represent means  $\pm$  SD ( $n=16$ ). No statistical differences between mutant and wild type were detected under each condition ( $P>0.05$ ; Student's *t*-test).
