# Supplementary material for: Intron Retention in the 5′UTR of the Novel ZIF2 Transporter Enhances Translation to Promote Zinc Tolerance in Arabidopsis
Source: PubMed Central journal article supplement (PMC4022490; doi:10.1371/journal.pgen.1004375), 2014-05-15
Supplement: pgen.1004375.s009.pdf [file pgen.1004375.s009.pdf]

**Figure S9**

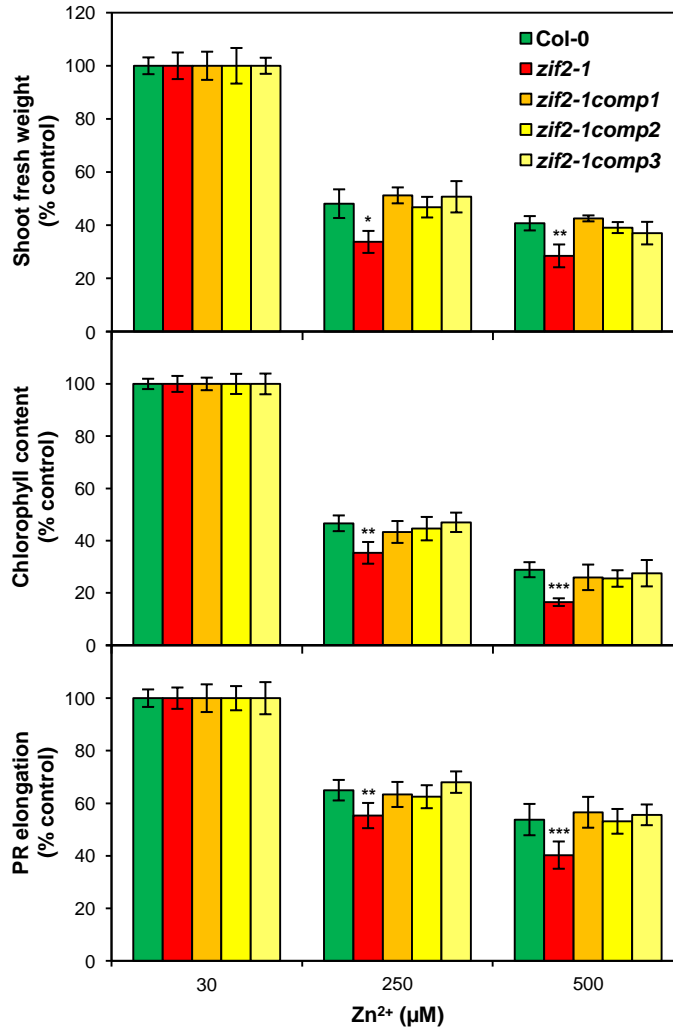

**Figure S9** Genomic complementation of the *Arabidopsis* *zif2-1* mutant phenotype. Effect of Zn toxicity on shoot biomass (upper panel), chlorophyll content (middle panel) and PR elongation (lower panel) of seedlings of the wild type (Col-0), the *zif2-1* mutant and three independent genomic complementation lines, *zif2-1comp1-3*. Results are representative of three independent experiments and values represent means  $\pm$  SD ( $n=8$  for shoot biomass/chlorophyll content and  $n=16$  for PR elongation). Asterisks denote statistically significant differences from the wild type under each condition (\* $P<0.05$ , \*\* $P<0.01$ , \*\*\* $P<0.001$ ; Student's *t*-test).
