# Supplementary material for: Intron Retention in the 5′UTR of the Novel ZIF2 Transporter Enhances Translation to Promote Zinc Tolerance in Arabidopsis
Source: PubMed Central journal article supplement (PMC4022490; doi:10.1371/journal.pgen.1004375), 2014-05-15
Supplement: pgen.1004375.s010.pdf [file pgen.1004375.s010.pdf]

**Figure S10**

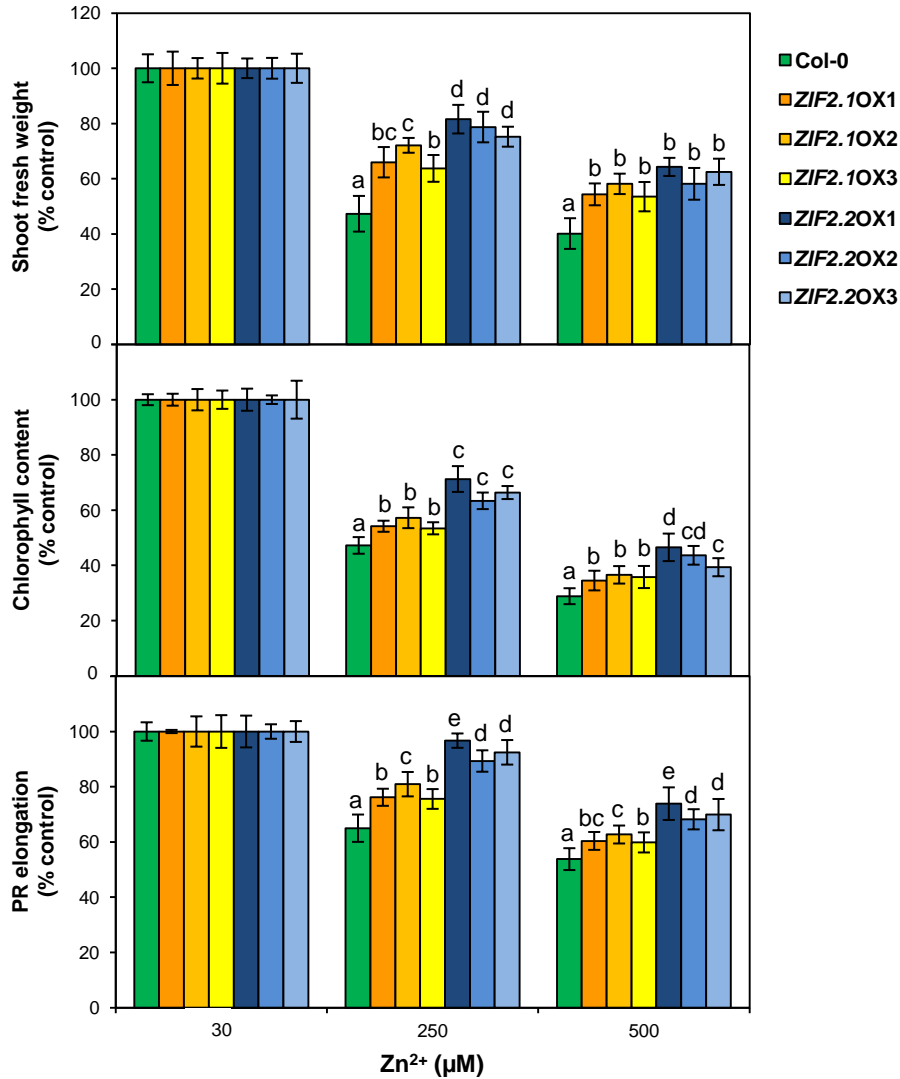

**Figure S10** Phenotype of *Arabidopsis* *ZIF2.1* and *ZIF2.2* overexpression lines. Effect of Zn toxicity on shoot biomass (upper panel), chlorophyll content (middle panel) and PR elongation (lower panel) of wild-type (Col-0) and *ZIF2.1*- or *ZIF2.2*-overexpressing (*ZIF2.1OX1-3* or *ZIF2.2OX1-3*) seedlings. Results are representative of three independent experiments and values represent means  $\pm$  SD ( $n=8$  for shoot biomass/chlorophyll content and  $n=16$  for PR elongation). Different letters indicate statistically significant differences between genotypes under each condition ( $P<0.05$ ; Student's *t*-test).
