# Supplementary material for: Intron Retention in the 5′UTR of the Novel ZIF2 Transporter Enhances Translation to Promote Zinc Tolerance in Arabidopsis
Source: PubMed Central journal article supplement (PMC4022490; doi:10.1371/journal.pgen.1004375), 2014-05-15
Supplement: pgen.1004375.s011.pdf [file pgen.1004375.s011.pdf]

**Figure S11**

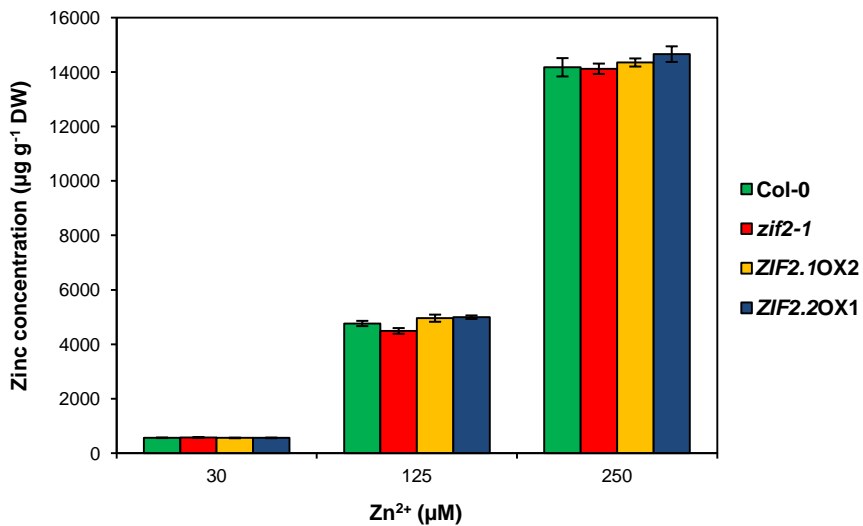

**Figure S11** Whole-seedling zinc concentration of *Arabidopsis* wild-type, *zif2-1* mutant and *ZIF2* overexpression lines. Zn concentration, expressed on a dry weight (DW) basis, in 21-d old seedlings of the wild type (Col-0), the *zif2-1* mutant and *ZIF2*-overexpressing lines (*ZIF2.1OX2* and *ZIF2.2OX1*) grown on control medium (30 µM Zn<sup>2+</sup>) or under excess Zn supply (125 or 250 µM Zn<sup>2+</sup>). Bars represent means ± SD ( $n=4$ ). No statistical differences between genotypes were detected under each condition ( $P>0.05$ ; Student's *t*-test).
