# Supplementary material for: Intron Retention in the 5′UTR of the Novel ZIF2 Transporter Enhances Translation to Promote Zinc Tolerance in Arabidopsis
Source: PubMed Central journal article supplement (PMC4022490; doi:10.1371/journal.pgen.1004375), 2014-05-15
Supplement: pgen.1004375.s012.pdf [file pgen.1004375.s012.pdf]

**Figure S12**

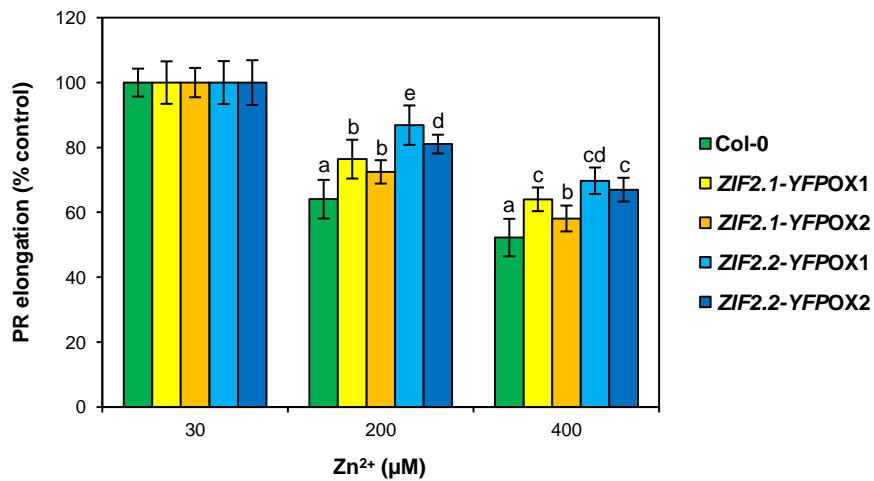

**Figure S12** Phenotype of *Arabidopsis* *ZIF2.1-YFP* and *ZIF2.2-YFP* overexpression lines. Effect of Zn toxicity on PR elongation of wild type (Col-0) and *ZIF2.1-YFP* or *ZIF2.2-YFP* overexpression lines (*ZIF2.1-YFPOX1-2* or *ZIF2.2-YFPOX1-2*) seedlings. Results are representative of two independent experiments and values represent means  $\pm$  SD ( $n=16$ ). Different letters indicate statistically significant differences between genotypes under each condition ( $P<0.05$ ; Student's *t*-test).
