# Supplementary material for: Intron Retention in the 5′UTR of the Novel ZIF2 Transporter Enhances Translation to Promote Zinc Tolerance in Arabidopsis
Source: PubMed Central journal article supplement (PMC4022490; doi:10.1371/journal.pgen.1004375), 2014-05-15
Supplement: pgen.1004375.s013.pdf [file pgen.1004375.s013.pdf]

**Figure S13**

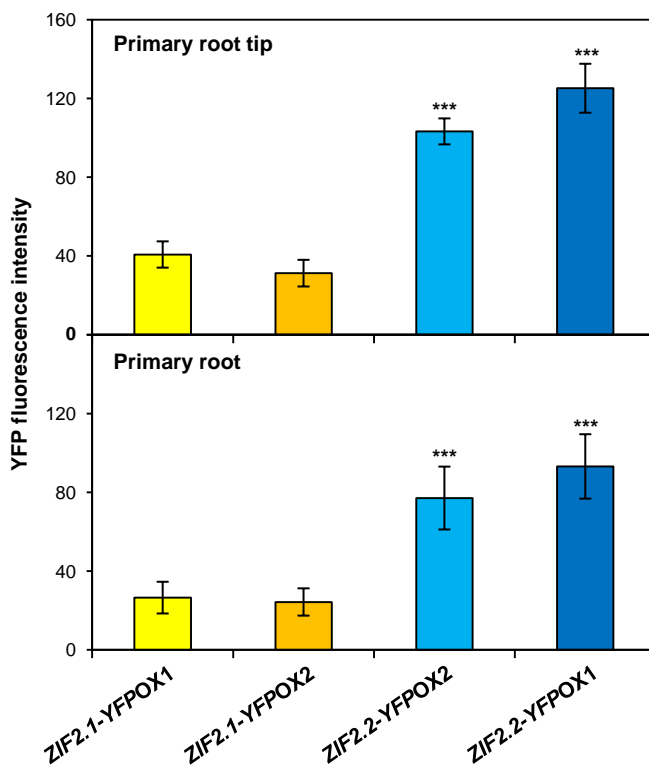

**Figure S13** Quantification of ZIF2-YFP protein levels in *Arabidopsis* ZIF2-YFP overexpression lines. Quantification of the YFP signal by confocal laser scanning microscopy in primary root tip (upper panel) and primary root (lower panel) cells from 5-d old seedlings of the ZIF2.1-YFPOX and ZIF2.2-YFPOX transgenic lines. In each panel, detection settings for YFP visualization were identical for all genotypes. Results are representative of three (upper panel) or two (lower panel) independent experiments and average fluorescence (pixel) intensity is shown (means  $\pm$  SD,  $n=12$ ). Asterisks denote statistically significant differences from the ZIF2.1-YFPOX1 line (\*\* $P < 0.001$ ; Student's t test).
