# Supplementary material for: Intron Retention in the 5′UTR of the Novel ZIF2 Transporter Enhances Translation to Promote Zinc Tolerance in Arabidopsis
Source: PubMed Central journal article supplement (PMC4022490; doi:10.1371/journal.pgen.1004375), 2014-05-15
Supplement: pgen.1004375.s014.pdf [file pgen.1004375.s014.pdf]

**Figure S14**

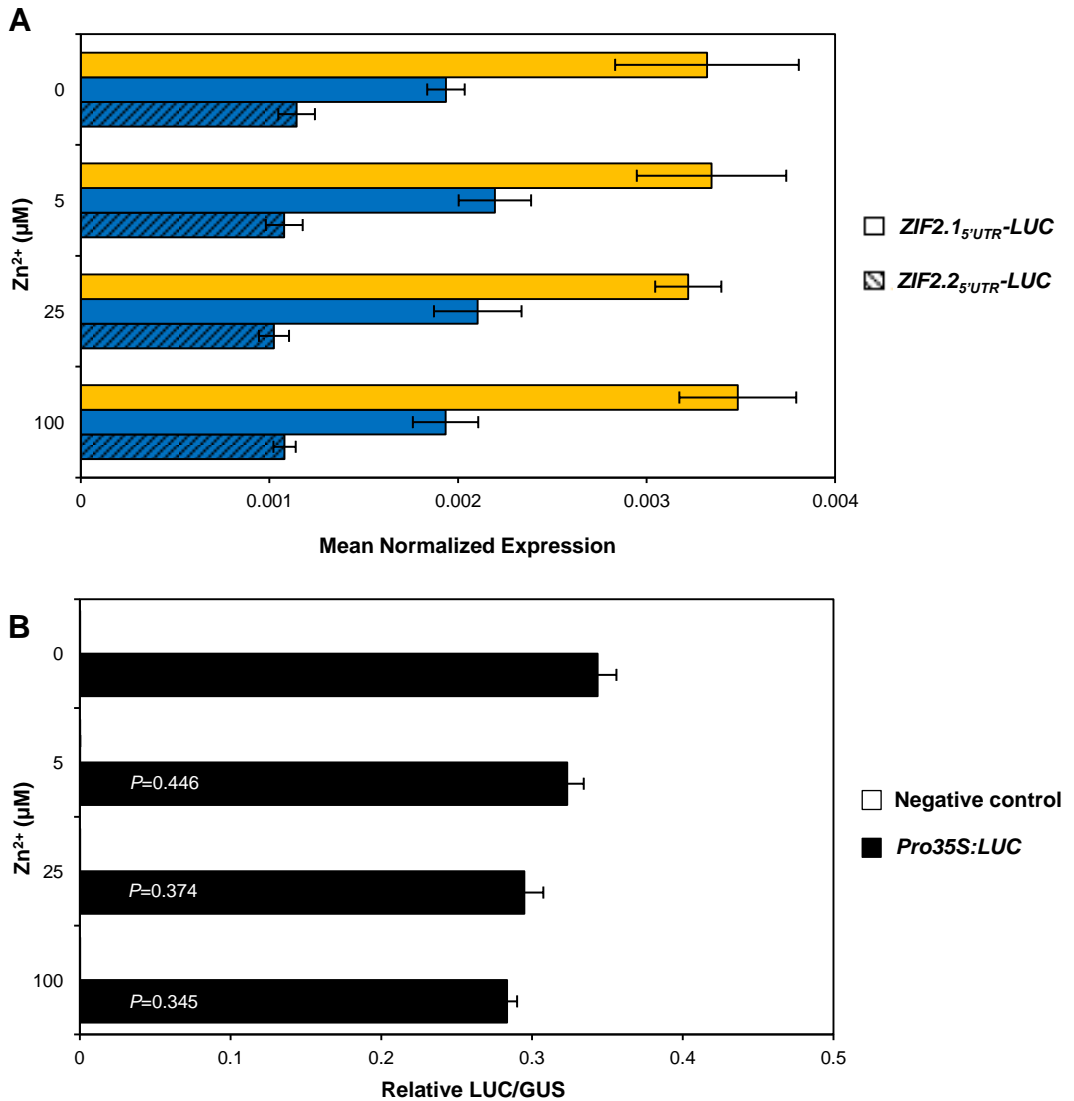

**Figure S14** Effect of zinc on transgene mRNA expression and luciferase (LUC) activity driven by the 35S promoter. **(A)** Real-time RT-PCR analysis of *ZIF2.1<sub>5'UTR</sub>-LUC* and *ZIF2.2<sub>5'UTR</sub>-LUC* transcript levels in protoplasts transiently expressing the *Pro35S:ZIF2.1<sub>5'UTR</sub>-LUC* (orange bars) or *Pro35S:ZIF2.2<sub>5'UTR</sub>-LUC* (blue bars) constructs under various Zn supplies, using *UBQ10* as a reference gene. Results are from two independent experiments and values represent means  $\pm$  SE ( $n=4$ ). No statistical differences were detected for each transcript between the different conditions ( $P>0.05$ ; Student's *t*-test). **(B)** Protoplast transient expression assay using the *Pro35S:LUC* (reference control) and *Pro35S:GUS<sub>mutated</sub>* (negative control, no detectable LUC activity) constructs under various Zn supplies. Results are representative of three independent experiments, corresponding to the same assay shown in Figure 9C. Values represent means  $\pm$  SD ( $n=4$ ). *P* values inside the bars indicate statistical differences for the *Pro35S:LUC* construct (comparison with 0  $\mu$ M Zn condition) obtained by Student's *t*-test.
