# Supplementary material for: Intron Retention in the 5′UTR of the Novel ZIF2 Transporter Enhances Translation to Promote Zinc Tolerance in Arabidopsis
Source: PubMed Central journal article supplement (PMC4022490; doi:10.1371/journal.pgen.1004375), 2014-05-15
Supplement: pgen.1004375.s015.pdf [file pgen.1004375.s015.pdf]

**Table S1** Growth parameters of *Arabidopsis ZIF2* loss-of-function and overexpression lines under control conditions.

| Genotype         | Shoot parameters    |                     | Root parameters     |                     |                     |
|------------------|---------------------|---------------------|---------------------|---------------------|---------------------|
|                  | FW<br>(mg/plant)    | CC<br>(mg/mg plant) | PRE<br>(cm)         | LRD<br>(LR/cm)      | TLRL<br>(cm)        |
| Col-0            | 9.04 ± 0.99         | 1.11 ± 0.30         | 3.97 ± 0.43         | 2.65 ± 0.35         | 9.75 ± 1.28         |
| <i>zif2-1</i>    | 8.96 ± 1.55 (0.457) | 1.08 ± 0.16 (0.404) | 3.94 ± 0.59 (0.465) | 2.67 ± 0.39 (0.406) | 9.87 ± 4.31 (0.461) |
| <i>ZIF2.1OX1</i> | 8.60 ± 1.39 (0.254) | 0.97 ± 0.20 (0.165) | 3.95 ± 0.77 (0.482) | 2.51 ± 0.21 (0.082) | 9.24 ± 1.35 (0.150) |
| <i>ZIF2.1OX2</i> | 8.60 ± 1.71 (0.283) | 1.03 ± 0.19 (0.295) | 3.69 ± 0.59 (0.085) | 2.50 ± 0.54 (0.177) | 9.46 ± 4.83 (0.412) |
| <i>ZIF2.1OX3</i> | 8.90 ± 2.24 (0.442) | 1.10 ± 0.24 (0.474) | 4.07 ± 0.60 (0.279) | 2.49 ± 0.47 (0.145) | 9.47 ± 3.99 (0.398) |
| <i>ZIF2.2OX1</i> | 8.83 ± 2.24 (0.411) | 0.93 ± 0.26 (0.121) | 3.74 ± 0.42 (0.090) | 2.60 ± 0.65 (0.401) | 9.86 ± 4.06 (0.459) |
| <i>ZIF2.2OX2</i> | 8.80 ± 2.14 (0.397) | 0.92 ± 0.12 (0.076) | 3.79 ± 0.34 (0.122) | 2.54 ± 0.73 (0.298) | 9.12 ± 2.50 (0.195) |
| <i>ZIF2.2OX3</i> | 8.90 ± 2.24 (0.442) | 1.03 ± 0.19 (0.288) | 3.71 ± 0.54 (0.086) | 2.53 ± 0.53 (0.234) | 9.49 ± 2.76 (0.370) |

Shoot biomass (fresh weight, FW), chlorophyll content (CC), PR elongation (PRE), lateral root density (LRD) and total lateral root length (TLRL) of 7-d (PRE) or 14-d (FW, CC, LRD, TLRL) old seedlings from the wild type (Col-0), the *zif2-1* mutant or *ZIF2.1*- and *ZIF2.2*-overexpressing lines grown on medium containing 30  $\mu\text{M}$   $\text{Zn}^{2+}$ . Results are representative of three independent experiments and values represent means  $\pm$  SD ( $n=8$  for FW/CC and  $n=16$  for PRE, LRD and TLRL). Numbers between parentheses indicate the *P* value (comparison with the wild type) obtained by Student's *t*-test.
