# Supplementary material for: Intron Retention in the 5′UTR of the Novel ZIF2 Transporter Enhances Translation to Promote Zinc Tolerance in Arabidopsis
Source: PubMed Central journal article supplement (PMC4022490; doi:10.1371/journal.pgen.1004375), 2014-05-15
Supplement: pgen.1004375.s016.pdf [file pgen.1004375.s016.pdf]

**Table S2** Sequences of primers used.

| PRIMER NAME                                                      | SEQUENCE (5' to 3')                      |
|------------------------------------------------------------------|------------------------------------------|
| <b>RLM-5'RACE</b>                                                |                                          |
| RACE1                                                            | CACAAGAACCGAACGCAAAA                     |
| RACE2                                                            | GAACCACAGACCGCAACGAA                     |
| RACE3                                                            | CACGGCTGGTCTGGTTTTGA                     |
| RACE4                                                            | TGTTCTCTGACGGCATCAC                      |
| RACE5                                                            | GAGACGAAGCCATTCAAGAG                     |
| RACE6                                                            | GAAAAGCGGAGGACAAGAAT                     |
| <b>Expression analyses</b>                                       |                                          |
| <u>Semi-quantitative RT-PCR</u>                                  |                                          |
| F1                                                               | CCGAGTGGGCTCAACG                         |
| F1'                                                              | CAAGTGATGCCGTCAGAGAA                     |
| F2                                                               | CGCTGCCTCCTTCCTT                         |
| F3                                                               | AGCAGCGTTTTCTTTCTATC                     |
| R1                                                               | GCCACCCGACTACACAAAA                      |
| R2                                                               | AGAAACCGCTGCTATCAAAC                     |
| R3                                                               | TGGCAGCGTAAATGAGG                        |
| ROC1-F                                                           | GTCTGATAGAGATCTCACGT                     |
| ROC1-R                                                           | AATCGGCAACAACAACAGGC                     |
| UBQ10-F1                                                         | GATCTTTGCCGAAAACAATTGG                   |
| UBQ10-R1                                                         | TAGAAAAGAAAAGATAACAGG                    |
| <u>Real-time RT-PCR</u>                                          |                                          |
| ZIF2.1-F                                                         | CCCGAGTGGGCTCAA                          |
| ZIF2.1-R                                                         | GAATGGCTTCGTCTCTT                        |
| ZIF2.2-F                                                         | TTGGTAAAGGACATAAAAC                      |
| ZIF2.2-R                                                         | GAAAAGCGGAGGACAAGAAT                     |
| ZIF2-F                                                           | AGAAAGGGGGCGATGAGAGT                     |
| ZIF2-R                                                           | CCAGTCTTCCGAGGTCCAG                      |
| UBQ10-F2                                                         | GACAATCACCCCTCGAGGTGG                    |
| UBQ10-R2                                                         | CATCCTCTAGCTGCTTGCCG                     |
| ZIF2.1-LUC-F                                                     | ATCTCTTGAATGGCTTCG                       |
| ZIF2.1-LUC-R                                                     | CAGCGGTTCCATCCT                          |
| ZIF2.2-LUC-F                                                     | CGCTTTTCCATTTTACTCTT                     |
| ZIF2.2-LUC-R                                                     | GGGCCTTTCTTTATGTTTT                      |
| <b>Cloning of ProZIF2:GUS-GFP construct</b>                      |                                          |
| ProZIF2-F                                                        | TT <u>GAGCTCG</u> ACCGCTCTGTTAGT         |
| ProZIF2-R                                                        | TT <u>CCGCGGC</u> TTCAGGTATTATGTATCTC    |
| <b>Cloning of ProZIF2:ZIF2 construct</b>                         |                                          |
| ZIF2comp-F                                                       | TT <u>CCATGGG</u> ACCGCTCTGTTAGT         |
| ZIF2comp-R                                                       | TT <u>TCTAG</u> ACTATGACTCGGGTTTCTAT     |
| <b>Cloning of Pro35S:ZIF2-YFP and Pro35S:ZIF2-GFP constructs</b> |                                          |
| ZIF2YFP-F                                                        | TT <u>CTCGAG</u> CCGAGTGGGCTCAACG        |
| ZIF2YFP-R                                                        | TT <u>AATTA</u> ATGGATTGACTATAGCTTGGA    |
| <b>Cloning of Pro35S:ZIF2 constructs</b>                         |                                          |
| ZIF2OX-F                                                         | TT <u>CTCGAG</u> CCGAGTGGGCTCAACG        |
| ZIF2OX-R                                                         | TT <u>GGCGCGC</u> CTGGATTGACTATAGCTTGGA  |
| <b>Cloning of Pro35S:ZIF2<sup>5'UTR</sup>-LUC constructs</b>     |                                          |
| ZIF2UTR-F                                                        | TT <u>GTCGAC</u> CCGAGTGGGCTCAACG        |
| ZIF2UTR-R                                                        | TTT <u>CATGACT</u> TTCAGGTATTATGTATCTC   |
| ZIF2UTRmutM-F                                                    | TATGTTTCTGTCTTCTTAAGTCACTTTTGCTTCAGGCTTC |
| ZIF2UTRmutM-R                                                    | GAAGCCTGAAGCAAAGTGACTTAAGAAGACAGAAACATA  |
| ZIF2UTRmutR-F                                                    | CGTCTCTTTTGCAATTTTGACTTTAGCCAAGTGCTCAAGG |
| ZIF2UTRmutR-R                                                    | CCTTGAGCACTTGGCTAAAGTCAAATTGCAAAGAGACG   |

Restriction sites are shown in italics and underlined.
